# Supplementary material for: Association of type 2 diabetes with central-scalp hair loss in a large cohort study of African American women
Source: PubMed Central journal article supplement — Int J Womens Dermatol. 2019 Jun 6;5(4):261–6. doi: 10.1016/j.ijwd.2019.05.010 (PMC6831789; doi:10.1016/j.ijwd.2019.05.010), 2019-06-06
Supplement: mmc1.pdf [file mmc1.pdf]

## BWHS Hair Loss Questionnaire

Welcome to the BWHS Hair Loss Questionnaire.

You have opened the [BWHS Hair Loss Questionnaire](#). The purpose of this questionnaire is to collect information that will help to determine reasons for hair loss among African American women. There are different types of hair loss, such as loss at the top of the scalp (sometimes diagnosed as CCCA, central centrifugal cicatricial alopecia) and loss on the sides of the scalp. Some of the questions will ask you to select from the photos and drawings.

After you have completed a page, please click the NEXT button at the bottom of the page to continue. If you have missed a question on a page, you will be reminded. If you do not want to answer that question, click on "NEXT" again.

Page 1 of 4

---

1. Have you ever experienced any hair loss on the **TOP** of your scalp?

- Yes       No

---

a. Which of the photos below best matches the **current** hair pattern at the **TOP** of your scalp?

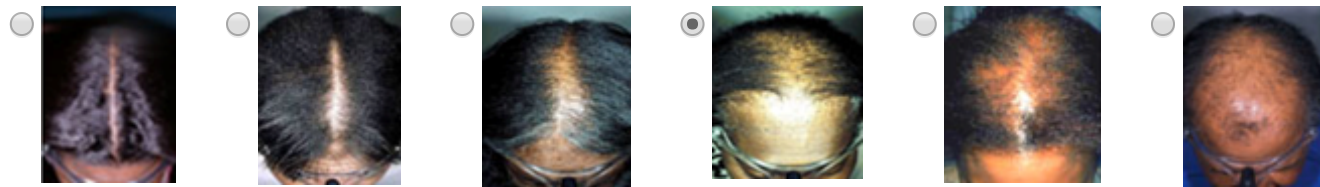

---

b. How severe would you consider your **current** hair loss on the **TOP** of your scalp to be?

- Mild       Moderate       Severe

---

c. How old were you first noticed any hair loss on the **TOP** of your scalp?

Age:

---

d. Which of the photos below best matches the **most severe** hair loss you ever had on the **TOP** of your scalp?

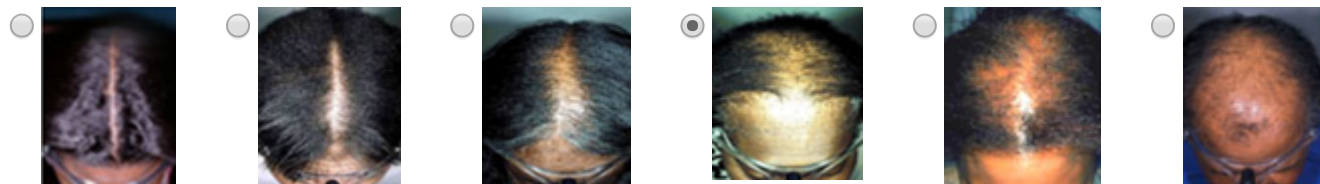

e. Has the hair loss on the **TOP** of the scalp gotten worse over time?

- Yes
  No
  Don't know

f. Did a doctor ever diagnose the hair loss at the **TOP** of your scalp as CCCA (central centrifugal cicatricial alopecia)?

- Yes
  No
  Don't know

g. Did your doctor base the diagnosis of CCCA on a biopsy (cells taken from your scalp)?

- Yes
  No
  Don't know

2. Which of the photos best match the **current** hair pattern of your mother, your mother's mother and your father's mother. (If the family member is deceased, please use your best recollection.)

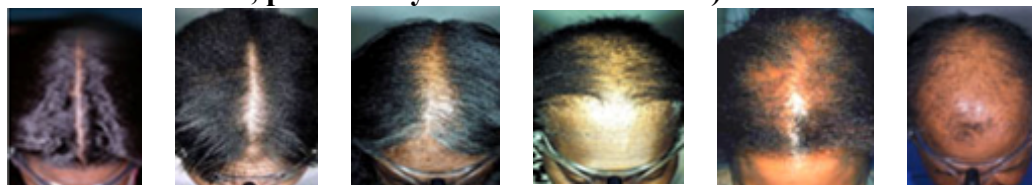

Don't know

|                 |                       |                       |                       |                                  |                       |                       |                                  |
|-----------------|-----------------------|-----------------------|-----------------------|----------------------------------|-----------------------|-----------------------|----------------------------------|
| Your mother     | <input type="radio"/> | <input type="radio"/> | <input type="radio"/> | <input checked="" type="radio"/> | <input type="radio"/> | <input type="radio"/> | <input type="radio"/>            |
| Mother's mother | <input type="radio"/> | <input type="radio"/> | <input type="radio"/> | <input type="radio"/>            | <input type="radio"/> | <input type="radio"/> | <input checked="" type="radio"/> |
| Father's mother | <input type="radio"/> | <input type="radio"/> | <input type="radio"/> | <input type="radio"/>            | <input type="radio"/> | <input type="radio"/> | <input checked="" type="radio"/> |

3. Have you experienced hair loss on parts of your scalp **other than the TOP**?

- Yes
  No

**Part of scalp**

- Back  
 Sides  
 Front  
 All over your scalp

**Age hair loss began**

## BWHS Hair Loss Questionnaire

After you have completed a page, please click the **NEXT** button at the bottom of the page to continue. If you have missed a question on a page, you will be reminded. If you do not want to answer that question, click on "NEXT" again.

Review completed pages by clicking on the page numbers at the left. A **red** page number indicates that some questions on that page have not been answered.

Page 2 of 4

4. Which of the photos best match the **current** hair pattern of your father, your mother's father and your father's father. (If the family member is deceased, please use your best recollection.)

Page 1

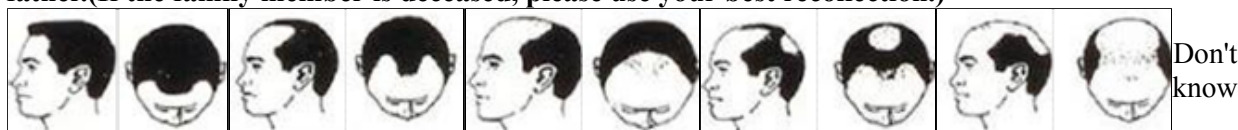

|                 |                       |                       |                       |                       |                       |                       |                       |                       |                       |
|-----------------|-----------------------|-----------------------|-----------------------|-----------------------|-----------------------|-----------------------|-----------------------|-----------------------|-----------------------|
| Your father     | <input type="radio"/> |
| Mother's father | <input type="radio"/> |
| Father's father | <input type="radio"/> |

5. The following are treatments sometimes used for hair loss. If you have tried any of the treatment options listed below for the hair loss on the **TOP** of your scalp, please indicate what the response was.

| Prior Treatment                                                 | Treatment appeared to help | Treatment did not help | Don't know            | Did not use           |
|-----------------------------------------------------------------|----------------------------|------------------------|-----------------------|-----------------------|
| (a). Antibiotic taken as a pill                                 | <input type="radio"/>      | <input type="radio"/>  | <input type="radio"/> | <input type="radio"/> |
| (b). Antibiotic applied to scalp (e.g. cream or lotion)         | <input type="radio"/>      | <input type="radio"/>  | <input type="radio"/> | <input type="radio"/> |
| (c). Topical Minoxidil (e.g., Rogaine)                          | <input type="radio"/>      | <input type="radio"/>  | <input type="radio"/> | <input type="radio"/> |
| (d). Antifungal applied to scalp (e.g., cream or lotion)        | <input type="radio"/>      | <input type="radio"/>  | <input type="radio"/> | <input type="radio"/> |
| (e). Antifungal taken by mouth                                  | <input type="radio"/>      | <input type="radio"/>  | <input type="radio"/> | <input type="radio"/> |
| (f). Steroid applied to scalp (cream, ointment, lotion or foam) | <input type="radio"/>      | <input type="radio"/>  | <input type="radio"/> | <input type="radio"/> |
| (g). Internal steroid taken as a pill (e.g., Prednisone)        | <input type="radio"/>      | <input type="radio"/>  | <input type="radio"/> | <input type="radio"/> |
| (h). Steroid injected into the scalp                            | <input type="radio"/>      | <input type="radio"/>  | <input type="radio"/> | <input type="radio"/> |
| (i). Over-the-counter self-treatment                            | <input type="radio"/>      | <input type="radio"/>  | <input type="radio"/> | <input type="radio"/> |

6. Have you ever used a chemical relaxer (lye, no lye, texturizer, Jheri curl)?

Yes       No

7. If you **currently** use a relaxer, how often do you get touch-ups?

- a. Relaxer ("lye")                      At least every  week(s)
- b. Relaxer ("no-lye")                  At least every  week(s)
- c. Jheri Curl                              At least every  week(s)
- d. Texturizer                              At least every  week(s)

**e. Other**

At least every  week(s)

## BWHS Hair Loss Questionnaire

After you have completed a page, please click the NEXT button at the bottom of the page to continue. If you have missed a question on a page, you will be reminded. If you do not want to answer that question, click on "NEXT" again.

Review completed pages by clicking on the page numbers at the left. A red page number indicates that some questions on that page have not been answered.

Page 3 of 4

Page 1

8. Are you **currently** using a moisturizer (oil, lotion, cream, ointment or grease) on your scalp?

- Yes       No

Page 2

a. If you are using a moisturizer, which are you using: **(Mark all that apply)**

- Oil                       Lotion                       Cream                       Ointment or grease  
(like Vaseline)

9. Which, if any, of the following conditions have you ever experienced? **(Mark all that apply)** (If you accidentally checked 'None of the above' in error, you need to uncheck it to have other options available)

- |                                                                           |                                                                          |
|---------------------------------------------------------------------------|--------------------------------------------------------------------------|
| <input type="checkbox"/> Adult acne                                       | <input type="checkbox"/> Rashes from conditioners                        |
| <input type="checkbox"/> Facial hair                                      | <input type="checkbox"/> Rashes from relaxers                            |
| <input checked="" type="checkbox"/> Irregular periods                     | <input type="checkbox"/> Rashes from other hair care products            |
| <input type="checkbox"/> Difficulty getting pregnant                      | <input type="checkbox"/> Thick (keloid) scars                            |
| <input checked="" type="checkbox"/> Vaginal yeast infections              | <input type="checkbox"/> Eczema (atopic dermatitis)                      |
| <input type="checkbox"/> Ring worm infection (fungal)                     | <input type="checkbox"/> Diabetes Type I (requires insulin)              |
| <input type="checkbox"/> Bacterial infections of the skin (e.g. impetigo) | <input type="checkbox"/> Diabetes Type II (diet or oral pill controlled) |
| <input type="checkbox"/> Fungal infection of the scalp                    | <input type="checkbox"/> Thyroid problems                                |
| <input type="checkbox"/> Seborrheic dermatitis/scaling on your scalp      | <input type="checkbox"/> None of the above                               |
| <input type="checkbox"/> Rashes from shampoo                              |                                                                          |

10. If you use any of these hair styles, how often do you use them?

**Hair Style**

**How often?**

**How many years used?**

**Age first used?**

a. Twists or locks

At least every

|                                                    |                                             |                      |                      |
|----------------------------------------------------|---------------------------------------------|----------------------|----------------------|
| b. Hot comb/press (no chemical process)            | At least every <input type="text"/> week(s) | <input type="text"/> | <input type="text"/> |
| c. Hair dye                                        | At least every <input type="text"/> week(s) | <input type="text"/> | <input type="text"/> |
| d. Braids (hair alone)                             | At least every <input type="text"/> week(s) | <input type="text"/> | <input type="text"/> |
| e. Braided with extensions                         | At least every <input type="text"/> week(s) | <input type="text"/> | <input type="text"/> |
| f. Hair weaves or tracks, glued                    | At least every <input type="text"/> week(s) | <input type="text"/> | <input type="text"/> |
| g. Hair weaves or tracks, sewed in                 | At least every <input type="text"/> week(s) | <input type="text"/> | <input type="text"/> |
| h. Other (please specify):<br><input type="text"/> | At least every <input type="text"/> week(s) | <input type="text"/> | <input type="text"/> |

## BWHS Hair Loss Questionnaire

After you have completed a page, please click the NEXT button at the bottom of the page to continue. If you have missed a question on a page, you will be reminded. If you do not want to answer that question, click on "NEXT" again. Review completed pages by clicking on the page numbers at the left. A red page number indicates that some questions on that page have not been answered.

Page 4 of 4

11. How often do you shampoo your hair?

Every  days

Page 1

Page 2

Page 3

12. Where do you usually do each of the following? (Mark all that apply)

|                   | at Home                             | at Salon                 | Do Not Use This                     |
|-------------------|-------------------------------------|--------------------------|-------------------------------------|
| Relax your hair   | <input type="checkbox"/>            | <input type="checkbox"/> | <input checked="" type="checkbox"/> |
| Color your hair   | <input type="checkbox"/>            | <input type="checkbox"/> | <input checked="" type="checkbox"/> |
| Shampoo your hair | <input checked="" type="checkbox"/> | <input type="checkbox"/> |                                     |

13. Thinking of your usual drying/styling routine, how do you usually dry your hair? (Mark all that apply)

- |                                                            |                                                    |
|------------------------------------------------------------|----------------------------------------------------|
| <input type="checkbox"/> Hood or bonnet dryer at home      | <input type="checkbox"/> Handheld blow dryer       |
| <input type="checkbox"/> Hood or bonnet dryer at the salon | <input checked="" type="checkbox"/> None (air dry) |

14. Please list any changes you have made to your hair care practices or products because of your hair loss. (Please be as specific as possible)

15. Have you ever worn a wig?

- Yes       No

a. Do you currently wear a wig?

- Yes       No

b. How long have you worn a wig?  years

**c. What type of wig have you worn? (Check all that apply)**

- Wig with human hair                       Wig with synthetic hair
- Other type (please specify):
- 

**16. What do you think might account for your hair loss?**
